# Supplementary material
Source: publisher site journal article supplement (https://www.dovepress.com/article/401603)

| **Table S1** Univariate analysis of possible risk factors for cognitive impairment of patients with CMBs. | | | | |
| --- | --- | --- | --- | --- |
| Variable | B value | Wald | *p-*value | OR (95% CI) |
| Lp-PLA2 | 0.020 | 14.045 | 0.000* | 1.020 (1.010–1.031) |
| Age | 0.065 | 12.201 | 0.000* | 1.067 (1.029–1.107) |
| Sex | 0.170 | 0.338 | 0.561 | 1.186 (0.668–2.106) |
| Hypertension | 0.383 | 1.474 | 0.225 | 1.777 (0.643–4.912) |
| DM | 0.419 | 2.234 | 0.135 | 1.520 (0.878–2.632) |
| History of stroke | 1.216 | 16.251 | 0.000* | 3.375 (1.868–6.097) |
| Presence of smoking | -0.044 | 0.024 | 0.876 | 0.957 (0.548–1.670) |
| Presence of drinking | 0.609 | 4.450 | 0.035* | 1.839 (1.044-3.240) |
| Usage of platelet aggregation inhibitor | 0.971 | 7.762 | 0.005* | 2.640 (1.334-5.226) |
| Usage of anticoagulant | -0.030 | 0.003 | 0.960 | 0.971 (0.303-3.111) |
| Usage of statins | 0.693 | 3.778 | 0.052 | 2.000 (0.994-4.023) |
| FPG | 0.079 | 1.031 | 0.310 | 1.082 (0.929–1.260) |
| HCY | 0.185 | 18.169 | 0.000* | 1.023 (1.105–1.310) |
| HDL-C | 0.658 | 1.270 | 0.260 | 1.931(0.615-6.065) |
| LDL-C | 0.311 | 0.999 | 0.318 | 1.365 (0.741-2.515) |
| TC | 0.241 | 1.506 | 0.220 | 1.273 (0.866-1.872) |
| TG | -0.374 | 2.657 | 0.103 | 0.688 (0.439-1.079) |
| FIB | -0.255 | 2.083 | 0.149 | 0.775(0.548-1.096) |
| Cr | 0.028 | 5.439 | 0.020* | 1.029 (1.005–1.053) |
| Hs-CRP | 0.006 | 0.007 | 0.933 | 1.006 (0.882-1.147) |
| Number of CMBs | 0.272 | 40.529 | 0.000* | 1.313 (1.207–1.427) |
| Location of CMBs | 0.070 | 0.163 | 0.000* | 1.072 (0.764–1.503) |
| **Note:***Significant at *p*<0.05  **Abbreviations:**B, unstandardized beta; OR, odds ratio.;CI, confidence interval;CMBs, cerebral microbleeds; DM, diabetes mellitus; FPG, fasting plasma glucose; Lp-PLA2, lipoprotein phospholipase A2; HDL-C, high-density lipoprotein cholesterol; LDL-C, low-density lipoprotein cholesterol; TC, total cholesterol; TG, triglyceride; FIB, fibrinogen; Cr, creatinine; HCY, homocysteine; Hs-CRP, high-sensitivity creactive protein. | | | | |

Figure S1 The mediation analysis of the relationship between the plasma Lp-PLA2 and MoCA scores, using the number of CMBs as a mediator. Abbreviations: Lp-PLA2, lipoprotein phospholipase A2;CMBs, cerebral microbleeds;β, regression coefficient; P, p-value of a regression coefficient; IE,indirect effect; c,total effect; c’,direct effect;ab=IE.


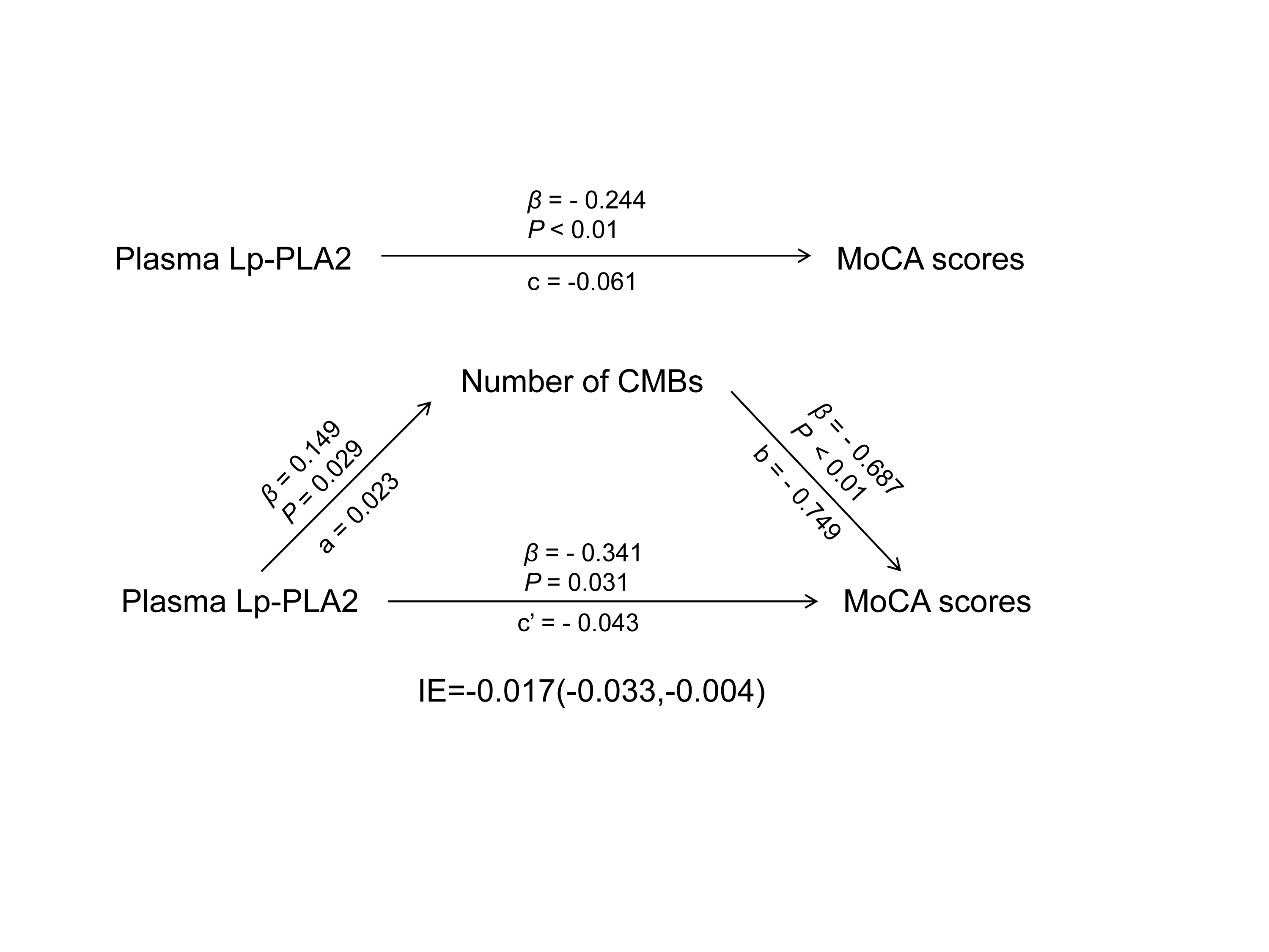

Supplement: Supplementary file 1 [file get_supplementary_file.php]
